# Supplementary material
Source: MDPI journal article supplement (https://www.mdpi.com/2071-1050/12/22/9618)
Supplement: s1 [file s1]

## Supplementary material: Comparative Assessment of Carbon Footprints of Selected Organizations: The Application of the Enhanced Bilan Carbone Model

Željko Jurić <sup>1,\*</sup> and Davor Ljubas <sup>2</sup>

<sup>1</sup> Energy Institute Hrvoje Požar, Department for Renewable Energy Sources, Climate and Environmental Protection, Savska cesta 163, 10001 Zagreb, Croatia; zjuric@eihp.hr

<sup>2</sup> University of Zagreb, Faculty of Mechanical Engineering and Naval Architecture, Ivana Lučića 5, 10000 Zagreb, Croatia; davor.ljubas@fsb.hr

\* Correspondence: zjuric@eihp.hr

**Table S1.** The CF of Agency for 2017, using the enhanced BC model.

| Emission category  | Emission source                                 | Activity data | Data unit      | Emission factor* | Emission factor unit               | Emissions (kg CO <sub>2</sub> e) |
|--------------------|-------------------------------------------------|---------------|----------------|------------------|------------------------------------|----------------------------------|
| Energy sources     | Purchased electricity from grid                 | 166,735       | kWh            | 0.351            | kgCO <sub>2</sub> e/kWh            | 58,558                           |
|                    | Purchased heat from district heating            | 107,571       | kWh            | 0.350            | kgCO <sub>2</sub> e/kWh            | 37,660                           |
|                    | Electricity grid losses                         | 166,735       | kWh            | 0.033            | kgCO <sub>2</sub> e/kWh            | 5465                             |
| Non-energy sources | Leakage of refrigerant (R407a)                  | 1000          | g              | 2.260            | kgCO <sub>2</sub> e/g              | 2260                             |
| People transport   | Employees commuting by diesel car               | 19,590        | l              | 3.230            | kgCO <sub>2</sub> e/l              | 63,268                           |
|                    | Employees commuting by gasoline car             | 29,983        | l              | 2.805            | kgCO <sub>2</sub> e/l              | 84,089                           |
|                    | Employees commuting by tram                     | 69,555        | p.km           | 0.007            | kgCO <sub>2</sub> e/p.km           | 1100                             |
|                    | Employees commuting by urban bus > 250 000 inh. | 165,655       | p.km           | 0.154            | kgCO <sub>2</sub> e/p.km           | 10,723                           |
|                    | Employees commuting by motorcycle               | 2018          | v.km           | 0.204            | kgCO <sub>2</sub> e/v.km           | 412                              |
|                    | Business travels by organization's diesel car   | 4849          | l              | 3.230            | kgCO <sub>2</sub> e/l              | 15,662                           |
|                    | Business travels by organization's gasoline car | 165           | l              | 2.805            | kgCO <sub>2</sub> e/l              | 463                              |
|                    | Business travels by car, other cases            | 58,040        | v.km           | 0.325            | kgCO <sub>2</sub> e/v.km           | 18,889                           |
|                    | Business travels by urban bus > 250 000 inh.    | 7902          | p.km           | 0.154            | kgCO <sub>2</sub> e/p.km           | 1218                             |
|                    | Business travels by urban bus < 150 000 inh.    | 24,583        | p.km           | 0.181            | kgCO <sub>2</sub> e/p.km           | 4461                             |
|                    | Business travels by electric train              | 890           | p.km           | 0.044            | kgCO <sub>2</sub> e/p.km           | 39                               |
|                    | Business travels by diesel train                | 1666          | p.km           | 0.087            | kgCO <sub>2</sub> e/p.km           | 145                              |
|                    | Business travels by plane, > 1000 km            | 346,451       | p.km           | 0.110            | kgCO <sub>2</sub> e/p.km           | 38,244                           |
|                    | Business travels by boat                        | 1682          | p.km           | 0.243            | kgCO <sub>2</sub> e/p.km           | 409                              |
|                    | Visitors travels by car – other cases           | 36,040        | v.km           | 0.325            | kgCO <sub>2</sub> e/v.km           | 11,729                           |
|                    | Visitors tr. by urban bus > 250 000 inh.        | 23,288        | p.km           | 0.154            | kgCO <sub>2</sub> e/p.km           | 3590                             |
|                    | Visitors travels by tram                        | 4288          | p.km           | 0.007            | kgCO <sub>2</sub> e/p.km           | 28                               |
|                    | Visitors travels by plane > 1000 km             | 18,240        | p.km           | 0.110            | kgCO <sub>2</sub> e/p.km           | 2013                             |
| Inputs             | Papers                                          | 974           | kg             | 0.718            | kgCO <sub>2</sub> e/kg             | 699                              |
|                    | Plastics                                        | 50            | kg             | 1.870            | kgCO <sub>2</sub> e/kg             | 94                               |
|                    | Meals - typical meal with chicken               | 6356          | meal           | 1.100            | kgCO <sub>2</sub> e/meal           | 6992                             |
|                    | Meals - typical meal with pork                  | 6356          | meal           | 1.930            | kgCO <sub>2</sub> e/meal           | 12,267                           |
|                    | Meals - typical meal with beef                  | 2119          | meal           | 4.510            | kgCO <sub>2</sub> e/meal           | 9554                             |
|                    | Meals - fish                                    | 6356          | meal           | 0.470            | kgCO <sub>2</sub> e/meal           | 2987                             |
|                    | Meals - vegetarian                              | 4237          | meal           | 0.440            | kgCO <sub>2</sub> e/meal           | 1864                             |
|                    | Water consumption                               | 1012          | m <sup>3</sup> | 0.132            | kgCO <sub>2</sub> e/m <sup>3</sup> | 134                              |
|                    | Office equipment                                | 1172          | EUR            | 0.917            | kgCO <sub>2</sub> e/EUR            | 1075                             |
|                    | Services with low level of equipment            | 369,853       | EUR            | 0.037            | kgCO <sub>2</sub> e/EUR            | 13,574                           |
|                    | Services with high level of equipment           | 353,836       | EUR            | 0.110            | kgCO <sub>2</sub> e/EUR            | 38,922                           |
| Direct waste       | Non-hazardous waste - recycled paper            | 1295          | kg             | 0.033            | kgCO <sub>2</sub> e/kg             | 43                               |
|                    | Non-hazardous waste - recycled plastic          | 100           | kg             | 0.033            | kgCO <sub>2</sub> e/kg             | 3                                |
|                    | Average municipal waste - landfilled            | 1757          | kg             | 0.383            | kgCO <sub>2</sub> e/kg             | 673                              |
|                    | Wastewater                                      | 1012          | m <sup>3</sup> | 0.262            | kgCO <sub>2</sub> e/m <sup>3</sup> | 265                              |
| End of life        | Non-hazardous waste - recycled paper            | 4810          | kg             | 0.223            | kgCO <sub>2</sub> e/kg             | 1 071                            |
|                    | Non-hazardous waste - recycled plastic          | 50            | kg             | 0.033            | kgCO <sub>2</sub> e/kg             | 1.7                              |
| Capital goods      | Building (amortization: 40 years)               | 1755          | m <sup>2</sup> | 11.725           | kgCO <sub>2</sub> e/m <sup>2</sup> | 20,579                           |
|                    | Furniture (amortization: 5 years)               | 2955          | kg             | 0.367            | kgCO <sub>2</sub> e/kg             | 1083                             |
|                    | IT equipment (amortization: 4 years)            | 75,969        | EUR            | 0.229            | kgCO <sub>2</sub> e/EUR            | 17,416                           |
|                    | Laptops and PCs (amortization: 4 years)         | 20            | unit           | 0.320            | tCO <sub>2</sub> e/unit            | 6400                             |
|                    | Monitors (amortization: 4 years)                | 102           | unit           | 0.192            | tCO <sub>2</sub> e/unit            | 19,559                           |
|                    | Printers (amortization: 4 years)                | 1             | unit           | 0.028            | tCO <sub>2</sub> e/unit            | 28                               |
|                    | Copy machines (amortization: 4 years)           | 1             | unit           | 0.735            | tCO <sub>2</sub> e/unit            | 735                              |
| <b>Total</b>       |                                                 |               |                |                  |                                    | <b>516,441</b>                   |

\* Croatian country-specific emission factors for purchased heat, purchased electricity, travel by car, travel by train, and paper input were used, instead of default French Bilan Carbone emission factors.

**Table S2.** The CF of Faculty for 2017, using the enhanced BC.

| Emission category | Emission Source                                 | Activity Data | Data Unit      | Emission Factor* | Emission Factor Unit               | Emissions (kg CO <sub>2</sub> e) |
|-------------------|-------------------------------------------------|---------------|----------------|------------------|------------------------------------|----------------------------------|
| Energy sources    | Purchased electricity from grid                 | 1,313,125     | kWh            | 0.351            | kg CO <sub>2</sub> e/kWh           | 461,173                          |
|                   | Purchased heat from district heating            | 4,510,000     | kWh            | 0.350            | kg CO <sub>2</sub> e/kWh           | 1,578,923                        |
|                   | Natural gas consumption                         | 85,048        | kWh            | 0.222            | kg CO <sub>2</sub> e/kWh           | 18,855                           |
|                   | Electricity grid losses                         | 1,313,125     | kWh            | 0.033            | kg CO <sub>2</sub> e/kWh           | 43,043                           |
| People transport  | Employees commuting by diesel car               | 61,773        | l              | 3.230            | kgCO <sub>2</sub> e/l              | 199,502                          |
|                   | Employees commuting by gasoline car             | 30,416        | l              | 2.805            | kgCO <sub>2</sub> e/l              | 85,304                           |
|                   | Employees commuting by LPG car                  | 2068          | l              | 1.838            | kgCO <sub>2</sub> e/l              | 3800                             |
|                   | Employees commuting by tram                     | 41,197        | p.km           | 0.007            | kgCO <sub>2</sub> e/p.km           | 274                              |
|                   | Employees commuting by urban bus > 250 000 inh. | 74,349        | p.km           | 0.154            | kgCO <sub>2</sub> e/p.km           | 11,462                           |
|                   | Employees commuting by electric train           | 147,073       | p.km           | 0.044            | kgCO <sub>2</sub> e/p.km           | 6406                             |
|                   | Employees commuting by motorcycle               | 4875          | v.km           | 0.204            | kgCO <sub>2</sub> e/v.km           | 995                              |
|                   | Business tr. by organization's diesel car       | 1606          | l              | 3.230            | kgCO <sub>2</sub> e/l              | 5188                             |
|                   | Business travels by private diesel car          | 20,722        | l              | 3.230            | kgCO <sub>2</sub> e/l              | 66,925                           |
|                   | Business travels by private gasoline car        | 16,610        | l              | 2.805            | kgCO <sub>2</sub> e/l              | 46,583                           |
|                   | Business travels by urban bus > 250 000 inh.    | 75,518        | p.km           | 0.154            | kgCO <sub>2</sub> e/p.km           | 11,642                           |
|                   | Business travels by electric train              | 8634          | p.km           | 0.044            | kgCO <sub>2</sub> e/p.km           | 376                              |
|                   | Business travels by plane, 0-1000 km            | 23,462        | p.km           | 0.127            | kgCO <sub>2</sub> e/p.km           | 2980                             |
|                   | Business travels by plane, > 1000 km            | 1,724,962     | p.km           | 0.110            | kgCO <sub>2</sub> e/p.km           | 190,416                          |
|                   | Visitors travels by diesel car                  | 51,310        | l              | 3.230            | kgCO <sub>2</sub> e/l              | 165,710                          |
|                   | Visitors travels by gasoline car                | 42,553        | l              | 2.805            | kgCO <sub>2</sub> e/l              | 119,343                          |
|                   | Visitors tr. by urban bus > 250 000 inh.        | 520,065       | p.km           | 0.154            | kgCO <sub>2</sub> e/p.km           | 80,173                           |
|                   | Visitors travels by electricity train           | 617,428       | p.km           | 0.044            | kgCO <sub>2</sub> e/p.km           | 26,892                           |
|                   | Visitors travels by tram                        | 282,711       | p.km           | 0.007            | kgCO <sub>2</sub> e/p.km           | 1877                             |
|                   | Visitors travels by plane > 1000 km             | 135,867       | p.km           | 0.110            | kgCO <sub>2</sub> e/p.km           | 14,998                           |
| Inputs            | Papers                                          | 5052          | kg             | 0.718            | kgCO <sub>2</sub> e/kg             | 3628                             |
|                   | Meals - typical meal with chicken               | 72,000        | meal           | 1.100            | kgCO <sub>2</sub> e/meal           | 79,200                           |
|                   | Meals - typical meal with pork                  | 48,000        | meal           | 1.930            | kgCO <sub>2</sub> e/meal           | 92,640                           |
|                   | Meals - typical meal with beef                  | 24,000        | meal           | 4.510            | kgCO <sub>2</sub> e/meal           | 108,240                          |
|                   | Meals - fish                                    | 60,000        | meal           | 0.470            | kgCO <sub>2</sub> e/meal           | 28,200                           |
|                   | Meals - vegetarian                              | 36,000        | meal           | 0.440            | kgCO <sub>2</sub> e/meal           | 15,840                           |
|                   | Water consumption                               | 18,041        | m <sup>3</sup> | 0.132            | kgCO <sub>2</sub> e/m <sup>3</sup> | 2381                             |
|                   | Office equipment                                | 205,230       | EUR            | 0.917            | kgCO <sub>2</sub> e/EUR            | 188,196                          |
| Direct waste      | Consumables                                     | 57,260        | EUR            | 0.367            | kgCO <sub>2</sub> e/EUR            | 21,014                           |
|                   | Non-hazardous waste - recycled paper            | 1500          | kg             | 0.033            | kgCO <sub>2</sub> e/kg             | 50                               |
|                   | Non-hazardous waste - recycled plastic          | 900           | kg             | 0.033            | kgCO <sub>2</sub> e/kg             | 30                               |
|                   | Average municipal waste - landfilled            | 71,787        | kg             | 0.383            | kgCO <sub>2</sub> e/kg             | 27,494                           |
| End of life       | Wastewater                                      | 18,041        | m <sup>3</sup> | 0.262            | kgCO <sub>2</sub> e/m <sup>3</sup> | 4727                             |
|                   | Non-hazardous waste - recycled paper            | 2,875         | kg             | 0.223            | kgCO <sub>2</sub> e/kg             | 640                              |
| Capital goods     | Non-hazardous waste - recycled plastic          | 144           | kg             | 0.033            | kgCO <sub>2</sub> e/kg             | 4.7                              |
|                   | Furniture (amortization: 5 years)               | 49,945        | kg             | 0.367            | kgCO <sub>2</sub> e/kg             | 18,310                           |
|                   | IT equipment (amortization: 4 years)            | 1,789,794     | EUR            | 0.229            | kgCO <sub>2</sub> e/EUR            | 410,310                          |
|                   | Laptops and PCs (amortization: 4 years)         | 109           | unit           | 0.320            | tCO <sub>2</sub> e/unit            | 34,880                           |
|                   | Monitors (amortization: 4 years)                | 291           | unit           | 0.192            | tCO <sub>2</sub> e/unit            | 55,799                           |
|                   | Printers (amortization: 4 years)                | 70            | unit           | 0.028            | tCO <sub>2</sub> e/unit            | 1925                             |
|                   | Copy machines (amortization: 4 years)           | 143           | unit           | 0.735            | tCO <sub>2</sub> e/unit            | 18,340                           |
| <b>Total</b>      |                                                 |               |                |                  |                                    | <b>4,254,687</b>                 |

\* Croatian country-specific emission factors for purchased heat, purchased electricity, natural gas consumption, travel by car, travel by train, and paper input were used, instead of default French Bilan Carbone emission factors.

**Table S3.** The CF of Institute for 2017, using the enhanced BC.

| Emission Category  | Emission Source                                 | Activity Data | Data Unit      | Emission Factor* | Emission Factor Unit               | Emissions (kg CO <sub>2</sub> e)** |
|--------------------|-------------------------------------------------|---------------|----------------|------------------|------------------------------------|------------------------------------|
| Energy sources     | Purchased electricity from grid                 | 229,524       | kWh            | 0.351            | kgCO <sub>2</sub> e/kWh            | 80,609                             |
|                    | Purchased heat from district heating            | 163,138       | kWh            | 0.350            | kgCO <sub>2</sub> e/kWh            | 57,113                             |
|                    | Electricity grid losses                         | 229,524       | kWh            | 0.033            | kgCO <sub>2</sub> e/kWh            | 7524                               |
| Non-energy sources | Leakage of refrigerant (R417a)                  | 2910          | g              | 2.490            | kgCO <sub>2</sub> e/g              | 7246                               |
| Freight transport  | Upstream transport of paper                     | 3018          | t.km           | 1.233            | kgCO <sub>2</sub> e/t.km           | 3018                               |
|                    | Downstream transport of studies                 | 84            | l              | 3.230            | kgCO <sub>2</sub> e/l              | 84                                 |
| People transport   | Employees commuting by diesel car               | 14,486        | l              | 3.230            | kgCO <sub>2</sub> e/l              | 46,783                             |
|                    | Employees commuting by gasoline car             | 6947          | l              | 2.805            | kgCO <sub>2</sub> e/l              | 19,482                             |
|                    | Employees commuting by tram                     | 23,657        | p.km           | 0.007            | kgCO <sub>2</sub> e/p.km           | 157                                |
|                    | Employees commuting by urban bus > 250 000 inh. | 5672          | p.km           | 0.154            | kgCO <sub>2</sub> e/p.km           | 874                                |
|                    | Business tr. by organization's diesel car       | 10,674        | l              | 3.230            | kgCO <sub>2</sub> e/l              | 34,474                             |
|                    | Business travels by private diesel car          | 335           | l              | 3.230            | kgCO <sub>2</sub> e/l              | 1080                               |
|                    | Business travels by private gasoline car        | 156           | l              | 2.805            | kgCO <sub>2</sub> e/l              | 438                                |
|                    | Business travels by urban bus > 250 000 inh.    | 7110          | p.km           | 0.154            | kgCO <sub>2</sub> e/p.km           | 1096                               |
|                    | Business travels by plane, > 1000 km            | 660,954       | p.km           | 0.110            | kgCO <sub>2</sub> e/p.km           | 72,962                             |
|                    | Visitors travels by diesel car                  | 3160          | l              | 3.230            | kgCO <sub>2</sub> e/l              | 10,204                             |
|                    | Visitors travels by gasoline car                | 2347          | l              | 2.805            | kgCO <sub>2</sub> e/l              | 6583                               |
|                    | Visitors travels by tram                        | 3852          | p.km           | 0.007            | kgCO <sub>2</sub> e/p.km           | 26                                 |
|                    | Visitors travels by plane > 1000 km             | 173,340       | p.km           | 0.110            | kgCO <sub>2</sub> e/p.km           | 19,135                             |
| Inputs             | Papers                                          | 1098          | kg             | 0.718            | kgCO <sub>2</sub> e/kg             | 788                                |
|                    | Plastics                                        | 6             | kg             | 1.870            | kgCO <sub>2</sub> e/kg             | 11                                 |
|                    | Meals - typical meal with chicken               | 6246          | meal           | 1.100            | kgCO <sub>2</sub> e/meal           | 6870                               |
|                    | Meals - typical meal with pork                  | 3747          | meal           | 1.930            | kgCO <sub>2</sub> e/meal           | 7233                               |
|                    | Meals - typical meal with beef                  | 2498          | meal           | 4.510            | kgCO <sub>2</sub> e/meal           | 11,267                             |
|                    | Meals - fish                                    | 3569          | meal           | 0.470            | kgCO <sub>2</sub> e/meal           | 1677                               |
|                    | Meals - vegetarian                              | 1785          | meal           | 0.440            | kgCO <sub>2</sub> e/meal           | 785                                |
|                    | Water consumption                               | 1001          | m <sup>3</sup> | 0.132            | kgCO <sub>2</sub> e/m <sup>3</sup> | 132                                |
|                    | Office equipment                                | 7411          | EUR            | 0.917            | kgCO <sub>2</sub> e/EUR            | 6796                               |
|                    | Services with low level of equipment            | 182,336       | EUR            | 0.037            | kgCO <sub>2</sub> e/EUR            | 6692                               |
|                    | Services with high level of equipment           | 25,870        | EUR            | 0.110            | kgCO <sub>2</sub> e/EUR            | 2846                               |
| Direct waste       | Non-hazardous waste - recycled paper            | 823           | kg             | 0.033            | kgCO <sub>2</sub> e/kg             | 27                                 |
|                    | Non-hazardous waste - recycled plastic          | 290           | kg             | 0.033            | kgCO <sub>2</sub> e/kg             | 10                                 |
|                    | Non-hazardous waste - organic/food              | 1387          | kg             | 0.558            | kgCO <sub>2</sub> e/kg             | 774                                |
|                    | Hazardous waste (e.g. electronic waste)         | 448           | kg             | 0.128            | kgCO <sub>2</sub> e/kg             | 57                                 |
|                    | Wastewater                                      | 1001          | m <sup>3</sup> | 0.262            | kgCO <sub>2</sub> e/m <sup>3</sup> | 262                                |
| End of life        | Non-hazardous waste - recycled paper            | 274           | kg             | 0.223            | kgCO <sub>2</sub> e/kg             | 61                                 |
|                    | Non-hazardous waste - recycled plastic          | 41            | kg             | 0.033            | kgCO <sub>2</sub> e/kg             | 14                                 |
| Capital goods      | Building (amortization: 40 years)               | 2144          | m <sup>2</sup> | 11.725           | kgCO <sub>2</sub> e/m <sup>2</sup> | 25,138                             |
|                    | Vehicles (amortization: 4 years)                | 5132          | kg             | 1.375            | kgCO <sub>2</sub> e/kg             | 7057                               |
|                    | Furniture (amortization: 5 years)               | 2095          | kg             | 0.367            | kgCO <sub>2</sub> e/kg             | 768                                |
|                    | IT equipment (amortization: 4 years)            | 16,148        | EUR            | 0.229            | kgCO <sub>2</sub> e/EUR            | 3702                               |
|                    | Laptops and PCs (amortization: 4 years)         | 62            | unit           | 0.320            | tCO <sub>2</sub> e/unit            | 19,840                             |
|                    | Monitors (amortization: 4 years)                | 15            | unit           | 0.192            | tCO <sub>2</sub> e/unit            | 2876                               |
|                    | Printers (amortization: 4 years)                | 3             | unit           | 0.028            | tCO <sub>2</sub> e/unit            | 83                                 |
|                    | Copy machines (amortization: 4 years)           | 2             | unit           | 0.735            | tCO <sub>2</sub> e/unit            | 1470                               |
| <b>Total</b>       |                                                 |               |                |                  |                                    | <b>477,004</b>                     |

\* Croatian country-specific emission factors for purchased heat, purchased electricity, travel by car, and paper input were used, instead of default French Bilan Carbone emission factors.

\*\* presented EIHP's CF for 2017 is lower in comparison with estimated CF in the paper [28], due to recalculation of GHG emission for business and visitor travels by plane (used emission factor is 0.110 kgCO<sub>2</sub>e/p.km instead of 0.319 kgCO<sub>2</sub>e/p.km in [28]) and adding GHG emissions for input of plastics (11 kg CO<sub>2</sub>e).

**Table S4.** Key source analysis for Agency's CF in 2017—Level Assessment.

| No.          | Source Categories                     | GHG Emissions (t CO <sub>2</sub> e) | Share of Emission Sources (%) | Cumulative Total of Share (%) |
|--------------|---------------------------------------|-------------------------------------|-------------------------------|-------------------------------|
| 1            | Commuting – travel by car             | 147.357                             | 28.5331                       | 28.5331                       |
| 2            | Purchased electricity form grid       | 64.023                              | 12.3970                       | 40.9301                       |
| 3            | Input - services                      | 52.496                              | 10.1649                       | 51.0950                       |
| 4            | Capital goods - IT equipment          | 44.137                              | 8.5464                        | 59.6414                       |
| 5            | Business travels by plane             | 38.244                              | 7.4053                        | 67.0467                       |
| 6            | Purchased heat from district heating  | 37.660                              | 7.2922                        | 74.3389                       |
| 7            | Input - meals                         | 33.664                              | 6.5185                        | 80.8575                       |
| 8            | Capital goods - building              | 20.579                              | 3.9847                        | 84.8422                       |
| 9            | Business travels by private car       | 18.889                              | 3.6575                        | 88.4996                       |
| 10           | Business travels by office car        | 16.124                              | 3.1222                        | 91.6218                       |
| 11           | Visitors' travels by car              | 11.729                              | 2.2711                        | 93.8930                       |
| 12           | Commuting – travel by bus             | 10.723                              | 2.0763                        | 95.9692                       |
| 13           | Business travels by bus               | 5.679                               | 1.0997                        | 97.0689                       |
| 14           | Visitors' travel by bus               | 3.590                               | 0.6952                        | 97.7641                       |
| 15           | Leakage of refrigerant                | 2.260                               | 0.4376                        | 98.2017                       |
| 16           | Visitors' travel by plane             | 2.013                               | 0.3899                        | 98.5916                       |
| 17           | Commuting – travel by tram            | 1.100                               | 0.2130                        | 98.8045                       |
| 18           | Capital goods - furniture             | 1.083                               | 0.2098                        | 99.0143                       |
| 19           | Input - office equipment              | 1.075                               | 0.2081                        | 99.2224                       |
| 20           | End of life - papers                  | 1.071                               | 0.2075                        | 99.4298                       |
| 21           | Input - papers                        | 0.699                               | 0.1353                        | 99.5652                       |
| 22           | Non-hazardous average household waste | 0.673                               | 0.1303                        | 99.6955                       |
| 23           | Commuting – travel by motorcycle      | 0.412                               | 0.0797                        | 99.7752                       |
| 24           | Business travels by boat              | 0.409                               | 0.0792                        | 99.8544                       |
| 25           | Wastewater                            | 0.265                               | 0.0513                        | 99.9057                       |
| 26           | Business travels by train             | 0.184                               | 0.0355                        | 99.9413                       |
| 27           | Input - water consumption             | 0.134                               | 0.0259                        | 99.9671                       |
| 28           | Input - plastics                      | 0.094                               | 0.0181                        | 99.9853                       |
| 29           | Non-hazardous waste - papers          | 0.043                               | 0.0083                        | 99.9935                       |
| 30           | Visitors' travel by tram              | 0.028                               | 0.0055                        | 99.9990                       |
| 31           | Non-hazardous waste - plastics        | 0.003                               | 0.0006                        | 99.9997                       |
| 32           | End of life - plastics                | 0.002                               | 0.0003                        | 100.0000                      |
| <b>Total</b> |                                       | <b>516.441</b>                      | <b>100.0000</b>               |                               |

**Table S5.** Key source analysis for Faculty's CF in 2017—Level Assessment.

| No.          | Source Categories                    | GHG Emissions (t CO <sub>2</sub> e) | Share of Emission Sources (%) | Cumulative Total of Share (%) |
|--------------|--------------------------------------|-------------------------------------|-------------------------------|-------------------------------|
| 1            | Purchased heat from district heating | 1578.923                            | 37.1102                       | 37.1102                       |
| 2            | Capital IT equipment                 | 521.254                             | 12.2513                       | 49.3615                       |
| 3            | Purchased electricity from grid      | 480.028                             | 11.2823                       | 60.6438                       |
| 4            | Input - meals                        | 324.120                             | 7.6180                        | 68.2618                       |
| 5            | Commuting – travel by car            | 288.606                             | 6.7833                        | 75.0450                       |
| 6            | Visitors' travel by car              | 285.053                             | 6.6997                        | 81.7448                       |
| 7            | Input - office equipment             | 209.210                             | 4.9172                        | 86.6620                       |
| 8            | Business travels by plane            | 193.395                             | 4.5455                        | 91.2074                       |
| 9            | Business travels by private car      | 113.507                             | 2.6678                        | 93.8752                       |
| 10           | Visitors' travels by bus             | 80.173                              | 1.8843                        | 95.7596                       |
| 11           | Natural gas consumption              | 43.043                              | 1.0117                        | 96.7712                       |
| 12           | Household waste                      | 27.494                              | 0.6462                        | 97.4175                       |
| 13           | Visitors' travel by train            | 26.892                              | 0.6320                        | 98.0495                       |
| 14           | Capital goods - furniture            | 18.310                              | 0.4303                        | 98.4799                       |
| 15           | Visitors' travel by plane            | 14.998                              | 0.3525                        | 98.8324                       |
| 16           | Business travels by bus              | 11.642                              | 0.2736                        | 99.1060                       |
| 17           | Commuting – travel by bus            | 11.462                              | 0.2694                        | 99.3754                       |
| 18           | Commuting – travel by train          | 6.406                               | 0.1506                        | 99.5259                       |
| 19           | Business travels by office car       | 5.188                               | 0.1219                        | 99.6479                       |
| 20           | Wastewater                           | 4.727                               | 0.1111                        | 99.7590                       |
| 21           | Input - papers                       | 3.628                               | 0.0853                        | 99.8442                       |
| 22           | Input - water consumption            | 2.381                               | 0.0560                        | 99.9002                       |
| 23           | Visitors' travel by tram             | 1.877                               | 0.0441                        | 99.9443                       |
| 24           | Commuting – travel by motorcycle     | 0.995                               | 0.0234                        | 99.9677                       |
| 25           | End of life - papers                 | 0.640                               | 0.0151                        | 99.9828                       |
| 26           | Business travels by train            | 0.376                               | 0.0088                        | 99.9916                       |
| 27           | Commuting – travel by tram           | 0.274                               | 0.0064                        | 99.9980                       |
| 28           | Non-hazardous waste - papers         | 0.050                               | 0.0012                        | 99.9992                       |
| 29           | Non-hazardous waste - plastics       | 0.030                               | 0.0007                        | 99.9999                       |
| 30           | End of life - plastics               | 0.005                               | 0.0001                        | 100.0000                      |
| <b>Total</b> |                                      | <b>4254.687</b>                     | <b>100.0000</b>               |                               |

**Table S6.** Key source analysis for Institute's CF in 2017—Level Assessment.

| No.          | Source Categories                    | GHG Emissions (t CO <sub>2</sub> e) | Share of Emission Sources (%) | Cumulative Total of Share (%) |
|--------------|--------------------------------------|-------------------------------------|-------------------------------|-------------------------------|
| 1            | Purchased electricity from grid      | 88.133                              | 18.4764                       | 18.4764                       |
| 2            | Business travels by plane            | 72.962                              | 15.2958                       | 33.7722                       |
| 3            | Commuting - travel by car            | 66.265                              | 13.8919                       | 47.6641                       |
| 4            | Purchased heat from district heating | 57.113                              | 11.9734                       | 59.6375                       |
| 5            | Business travels by office car       | 34.474                              | 7.2273                        | 66.8647                       |
| 6            | Capital goods - IT equipment         | 27.971                              | 5.8638                        | 72.7285                       |
| 7            | Input - meals                        | 27.833                              | 5.8349                        | 78.5635                       |
| 8            | Capital goods - building             | 25.138                              | 5.2701                        | 83.8335                       |
| 9            | Visitors' travel by plane            | 19.135                              | 4.0114                        | 87.8450                       |
| 10           | Visitors' travel by car              | 16.787                              | 3.5193                        | 91.3643                       |
| 11           | Input - services                     | 9.537                               | 1.9995                        | 93.3637                       |
| 12           | Leakage of refrigerant               | 7.246                               | 1.5190                        | 94.8828                       |
| 13           | Capital goods - vehicles             | 7.057                               | 1.4793                        | 96.3621                       |
| 14           | Input - office equipment             | 6.796                               | 1.4246                        | 97.7867                       |
| 15           | Upstream transport of paper          | 3.722                               | 0.7803                        | 98.5671                       |
| 16           | Business travels by private car      | 1.518                               | 0.3183                        | 98.8853                       |
| 17           | Business travels by bus              | 1.096                               | 0.2298                        | 99.1151                       |
| 18           | Commuting – travel by bus            | 0.874                               | 0.1833                        | 99.2984                       |
| 19           | Input - papers                       | 0.788                               | 0.1652                        | 99.4636                       |
| 20           | Non-hazardous organic waste          | 0.774                               | 0.1623                        | 99.6259                       |
| 21           | Capital goods - furniture            | 0.768                               | 0.1610                        | 99.7869                       |
| 22           | Downstream transport of studies      | 0.272                               | 0.0570                        | 99.8438                       |
| 23           | Wastewater                           | 0.262                               | 0.0550                        | 99.8988                       |
| 24           | Commuting – travel by tram           | 0.157                               | 0.0329                        | 99.9318                       |
| 25           | Input - water consumption            | 0.132                               | 0.0277                        | 99.9595                       |
| 26           | End of life - papers                 | 0.061                               | 0.0128                        | 99.9723                       |
| 27           | Hazardous waste                      | 0.057                               | 0.0120                        | 99.9842                       |
| 28           | Non-hazardous waste - papers         | 0.027                               | 0.0057                        | 99.9899                       |
| 29           | Visitors' travel by tram             | 0.026                               | 0.0054                        | 99.9953                       |
| 30           | Input - plastics                     | 0.011                               | 0.0024                        | 99.9977                       |
| 31           | Non-hazardous waste - plastics       | 0.010                               | 0.0020                        | 99.9997                       |
| 32           | End of life - plastics               | 0.001                               | 0.0003                        | 100.0000                      |
| <b>Total</b> |                                      | <b>477.004</b>                      | <b>100.0000</b>               |                               |

**Table S7.** The uncertainties of the CF calculation for the Agency.

| Emission Category          | Emission Source                              | GHG Smissions in 2017 (kg CO <sub>2</sub> e) | Activity Data Uncertainty (%) | Emission Factor Uncertainty (%) | Combined Uncertainty (%) |
|----------------------------|----------------------------------------------|----------------------------------------------|-------------------------------|---------------------------------|--------------------------|
| Energy sources             | Purchased electricity from grid              | 58,558                                       | 5                             | 10                              | 11.18                    |
|                            | Purchased heat from district heating         | 37,660                                       | 5                             | 10                              | 11.18                    |
|                            | Electricity grid losses                      | 5465                                         | 5                             | 10                              | 11.18                    |
| Non-energy                 | Leakage of refrigerant                       | 2260                                         | 20                            | 30                              | 36.06                    |
| Inputs                     | Paper                                        | 699                                          | 10                            | 20                              | 22.36                    |
|                            | Plastics                                     | 94                                           | 10                            | 20                              | 22.36                    |
|                            | Typical meal with chicken                    | 6992                                         | 20                            | 50                              | 53.85                    |
|                            | Typical meal with pork                       | 12,267                                       | 20                            | 50                              | 53.85                    |
|                            | Typical meal with beef                       | 9554                                         | 20                            | 50                              | 53.85                    |
|                            | Fish meal                                    | 2987                                         | 20                            | 50                              | 53.85                    |
|                            | Vegetarian meal                              | 1864                                         | 20                            | 50                              | 53.85                    |
|                            | Water consumption                            | 134                                          | 5                             | 11                              | 12.08                    |
|                            | Office equipment                             | 1075                                         | 10                            | 50                              | 50.99                    |
|                            | Services with low level of equipment         | 13,574                                       | 10                            | 50                              | 50.99                    |
|                            | Services with high level of equipment        | 38,922                                       | 10                            | 50                              | 50.99                    |
| People transport           | Employees commuting by diesel car            | 63,268                                       | 10                            | 8                               | 12.81                    |
|                            | Employees commuting by gasoline car          | 84,089                                       | 10                            | 8                               | 12.81                    |
|                            | Employees commuting by bus                   | 10,723                                       | 10                            | 60                              | 60.83                    |
|                            | Employees commuting by motorcycle            | 412                                          | 10                            | 60                              | 60.83                    |
|                            | Employees commuting by tram                  | 1100                                         | 10                            | 60                              | 60.83                    |
|                            | Business tr. by organization's diesel car    | 15,662                                       | 5                             | 8                               | 9.43                     |
|                            | Business tr. by organization's gasoline car  | 463                                          | 5                             | 8                               | 9.43                     |
|                            | Business travels by car - other cases        | 18,889                                       | 10                            | 14                              | 17.20                    |
|                            | Business travels by urban bus > 250 000 inh. | 1218                                         | 10                            | 60                              | 60.83                    |
|                            | Business travels by urban bus < 150 000 inh. | 4461                                         | 10                            | 60                              | 60.83                    |
|                            | Business travels by electric train           | 145                                          | 10                            | 20                              | 22.36                    |
|                            | Business travels by diesel train             | 39                                           | 10                            | 20                              | 22.36                    |
|                            | Business travels by plane                    | 38,244                                       | 20                            | 20                              | 28.28                    |
|                            | Business travels by boat                     | 409                                          | 20                            | 10                              | 22.36                    |
|                            | Visitors travels by car                      | 11,729                                       | 20                            | 14                              | 24.41                    |
|                            | Visitors travels by bus                      | 3590                                         | 20                            | 60                              | 63.25                    |
|                            | Visitors travels by plane                    | 2013                                         | 20                            | 20                              | 28.28                    |
|                            | Visitors travels by tram                     | 28                                           | 20                            | 60                              | 63.25                    |
| Direct waste               | Average municipal waste - landfilled         | 673                                          | 20                            | 50                              | 53.85                    |
|                            | Non-hazardous waste - recycled plastic       | 3                                            | 20                            | 50                              | 53.85                    |
|                            | Non-hazardous waste - recycled paper         | 43                                           | 20                            | 50                              | 53.85                    |
|                            | Wastewater                                   | 265                                          | 5                             | 20                              | 20.62                    |
| Capital goods              | Building                                     | 20,579                                       | 5                             | 50                              | 50.25                    |
|                            | Furniture                                    | 1083                                         | 10                            | 50                              | 50.99                    |
|                            | Laptops and PCs                              | 6400                                         | 20                            | 50                              | 53.85                    |
|                            | Monitors                                     | 19,559                                       | 20                            | 50                              | 53.85                    |
|                            | Printers                                     | 28                                           | 20                            | 50                              | 53.85                    |
|                            | Copy machines                                | 735                                          | 20                            | 50                              | 53.85                    |
|                            | IT equipment                                 | 17,416                                       | 20                            | 50                              | 53.85                    |
| End of life                | Non-hazardous waste - recycled plastic       | 2                                            | 20                            | 30                              | 36.06                    |
|                            | Non-hazardous waste - recycled paper         | 1071                                         | 20                            | 50                              | 53.85                    |
| <b>Total GHG emission:</b> |                                              | <b>516,441</b>                               |                               |                                 |                          |
| <b>Total uncertainty:</b>  |                                              |                                              |                               |                                 | <b>8.40</b>              |

**Table S8.** The uncertainties of the CF calculation for the Faculty.

| Emission Category          | Emission Source                                 | GHG Emissions in 2017 (kg CO <sub>2</sub> e) | Activity Data Uncertainty (%) | Emission Factor Uncertainty (%) | Combined Uncertainty (%) |
|----------------------------|-------------------------------------------------|----------------------------------------------|-------------------------------|---------------------------------|--------------------------|
| Energy sources             | Purchased heat from district heating            | 1,578,923                                    | 5                             | 10                              | 11.18                    |
|                            | Purchased electricity from grid                 | 461,173                                      | 5                             | 10                              | 11.18                    |
|                            | Electricity grid losses                         | 43,043                                       | 5                             | 10                              | 11.18                    |
|                            | Natural gas consumption                         | 18,855                                       | 10                            | 8                               | 12.81                    |
| Inputs                     | Paper                                           | 3628                                         | 10                            | 20                              | 22.36                    |
|                            | Typical meal with chicken                       | 79,200                                       | 20                            | 50                              | 53.85                    |
|                            | Typical meal with pork                          | 92,640                                       | 20                            | 50                              | 53.85                    |
|                            | Typical meal with beef                          | 108,240                                      | 20                            | 50                              | 53.85                    |
|                            | Fish meal                                       | 28,200                                       | 20                            | 50                              | 53.85                    |
|                            | Vegetarian meal                                 | 15,840                                       | 20                            | 50                              | 53.85                    |
|                            | Water consumption                               | 2381                                         | 5                             | 11                              | 12.08                    |
|                            | Office equipment                                | 188,196                                      | 10                            | 50                              | 50.99                    |
|                            | Consumables                                     | 21,014                                       | 10                            | 50                              | 50.99                    |
| People transport           | Employees commuting by diesel car               | 199,502                                      | 10                            | 8                               | 12.81                    |
|                            | Employees commuting by diesel car               | 85,304                                       | 10                            | 8                               | 12.81                    |
|                            | Employees commuting by LPG car                  | 3800                                         | 10                            | 8                               | 12.81                    |
|                            | Employees commuting by urban bus > 250 000 inh. | 11,462                                       | 10                            | 60                              | 60.83                    |
|                            | Employees commuting by motorcycle               | 995                                          | 10                            | 60                              | 60.83                    |
|                            | Employees commuting by tram                     | 274                                          | 10                            | 60                              | 60.83                    |
|                            | Employees commuting by electric train           | 6406                                         | 10                            | 20                              | 22.36                    |
|                            | Business tr. by organization's diesel car       | 5188                                         | 5                             | 8                               | 9.43                     |
|                            | Business travels by private diesel car          | 66,925                                       | 10                            | 8                               | 12.81                    |
|                            | Business travels by private gasoline car        | 46,583                                       | 10                            | 8                               | 12.81                    |
|                            | Business travels by urban bus > 250 000 inh.    | 11,642                                       | 10                            | 60                              | 60.83                    |
|                            | Business travels by electric train              | 376                                          | 10                            | 20                              | 22.36                    |
|                            | Business travels by plane, 0-1000 km            | 2980                                         | 20                            | 20                              | 28.28                    |
|                            | Business travels by plane, > 1000 km            | 190,416                                      | 20                            | 20                              | 28.28                    |
|                            | Visitors travels by diesel car                  | 165,710                                      | 20                            | 8                               | 21.54                    |
|                            | Visitors travels by gasoline car                | 119,343                                      | 20                            | 8                               | 21.54                    |
|                            | Visitors tr. by urban bus > 250 000 inh.        | 80,173                                       | 20                            | 60                              | 63.25                    |
|                            | Visitors travels by plane > 1000 km             | 14,998                                       | 20                            | 20                              | 101.98                   |
|                            | Visitors travels by tram                        | 1877                                         | 20                            | 60                              | 63.25                    |
|                            | Visitors travels by electricity train           | 26,892                                       | 20                            | 20                              | 28.28                    |
| Direct waste               | Average municipal waste - landfilled            | 27,494                                       | 20                            | 50                              | 53.85                    |
|                            | Non-hazardous waste - recycled plastic          | 30                                           | 20                            | 50                              | 53.85                    |
|                            | Non-hazardous waste - recycled paper            | 50                                           | 20                            | 50                              | 53.85                    |
|                            | Wastewater                                      | 4727                                         | 5                             | 20                              | 20.62                    |
| Capital goods              | Furniture                                       | 18,310                                       | 10                            | 50                              | 50.99                    |
|                            | IT equipment                                    | 34,880                                       | 20                            | 50                              | 53.85                    |
|                            | Laptops and PCs                                 | 18,340                                       | 20                            | 50                              | 53.85                    |
|                            | Monitors                                        | 55,799                                       | 20                            | 50                              | 53.85                    |
|                            | Printers                                        | 1925                                         | 20                            | 50                              | 53.85                    |
|                            | Copy machines                                   | 410,310                                      | 20                            | 50                              | 53.85                    |
| End of life                | Non-hazardous waste - recycled plastic          | 640                                          | 20                            | 30                              | 36.06                    |
|                            | Non-hazardous waste - recycled paper            | 5                                            | 20                            | 50                              | 53.85                    |
| <b>Total GHG emission:</b> |                                                 | <b>4,254,687</b>                             |                               |                                 |                          |
| <b>Total uncertainty:</b>  |                                                 |                                              |                               |                                 | <b>7.80</b>              |



**Table S9.** The uncertainties of the CF calculation for the Institute.

| <b>Emission Category</b>   | <b>Emission Source</b>                   | <b>GHG Emissions in 2017 (kg CO<sub>2</sub>e)</b> | <b>Activity Data Uncertainty (%)</b> | <b>Emission Factor Uncertainty %</b> | <b>Combined Uncertainty %</b> |
|----------------------------|------------------------------------------|---------------------------------------------------|--------------------------------------|--------------------------------------|-------------------------------|
| Energy sources             | Purchased heat from district heating     | 57,113                                            | 5                                    | 10                                   | 11.18                         |
|                            | Purchased electricity from grid          | 80,609                                            | 5                                    | 10                                   | 11.18                         |
|                            | Electricity grid losses                  | 7524                                              | 5                                    | 10                                   | 11.18                         |
| Non-energy                 | Leakage of refrigerant                   | 7246                                              | 20                                   | 30                                   | 36.06                         |
| Inputs                     | Paper                                    | 788                                               | 10                                   | 20                                   | 22.36                         |
|                            | Plastics                                 | 11                                                | 10                                   | 20                                   | 22.36                         |
|                            | Typical meal with chicken                | 6870                                              | 20                                   | 50                                   | 53.85                         |
|                            | Typical meal with pork                   | 7233                                              | 20                                   | 50                                   | 53.85                         |
|                            | Typical meal with beef                   | 11,267                                            | 20                                   | 50                                   | 53.85                         |
|                            | Fish meal                                | 1677                                              | 20                                   | 50                                   | 53.85                         |
|                            | Vegetarian meal                          | 785                                               | 20                                   | 50                                   | 53.85                         |
|                            | Water consumption                        | 132                                               | 5                                    | 11                                   | 12.08                         |
|                            | Office equipment                         | 6796                                              | 10                                   | 50                                   | 50.99                         |
|                            | Services with low level of equipment     | 6692                                              | 10                                   | 50                                   | 50.99                         |
|                            | Services with high level of equipment    | 2846                                              | 10                                   | 50                                   | 50.99                         |
| Freight transport          | Upstream transport of paper              | 3722                                              | 10                                   | 12                                   | 15.62                         |
|                            | Downstream transport of studies          | 272                                               | 10                                   | 8                                    | 12.81                         |
| People transport           | Employees commuting by diesel car        | 46783                                             | 10                                   | 8                                    | 12.81                         |
|                            | Employees commuting by gasoline car      | 19,482                                            | 10                                   | 8                                    | 12.81                         |
|                            | Employees commuting by bus               | 874                                               | 10                                   | 60                                   | 60.83                         |
|                            | Employees commuting by tram              | 157                                               | 10                                   | 60                                   | 60.83                         |
|                            | Business travels by organization's car   | 34,474                                            | 5                                    | 8                                    | 9.43                          |
|                            | Business travels by private diesel car   | 1080                                              | 10                                   | 8                                    | 12.81                         |
|                            | Business travels by private gasoline car | 438                                               | 10                                   | 8                                    | 12.81                         |
|                            | Business travels by bus                  | 1096                                              | 10                                   | 60                                   | 60.83                         |
|                            | Business travels by train                | 0                                                 | 10                                   | 20                                   | 22.36                         |
|                            | Business travels by plane                | 72,962                                            | 20                                   | 20                                   | 28.28                         |
|                            | Visitors travels by diesel car           | 10,204                                            | 20                                   | 8                                    | 21.54                         |
|                            | Visitors travels by gasoline car         | 6583                                              | 20                                   | 8                                    | 21.54                         |
|                            | Visitors travels by plane                | 19,135                                            | 100                                  | 20                                   | 101.98                        |
|                            | Visitors travels by tram                 | 26                                                | 20                                   | 60                                   | 63.25                         |
| Direct waste               | Non-hazardous waste - organic/food       | 774                                               | 20                                   | 50                                   | 53.85                         |
|                            | Non-hazardous waste - recycled plastic   | 10                                                | 20                                   | 50                                   | 53.85                         |
|                            | Non-hazardous waste - recycled paper     | 27                                                | 20                                   | 50                                   | 53.85                         |
|                            | Hazardous waste                          | 57                                                | 20                                   | 50                                   | 53.85                         |
|                            | Wastewater                               | 262                                               | 5                                    | 20                                   | 20.62                         |
| Capital goods              | Building                                 | 25,138                                            | 5                                    | 50                                   | 50.25                         |
|                            | Vehicles                                 | 7057                                              | 10                                   | 50                                   | 50.99                         |
|                            | Furniture                                | 768                                               | 10                                   | 50                                   | 50.99                         |
|                            | Laptops and PCs                          | 19,840                                            | 20                                   | 50                                   | 53.85                         |
|                            | Monitors                                 | 2876                                              | 20                                   | 50                                   | 53.85                         |
|                            | Printers                                 | 83                                                | 20                                   | 50                                   | 53.85                         |
|                            | Copy machines                            | 1470                                              | 20                                   | 50                                   | 53.85                         |
|                            | IT equipment                             | 3702                                              | 20                                   | 50                                   | 53.85                         |
| End of life                | Non-hazardous waste - recycled plastic   | 1                                                 | 20                                   | 30                                   | 36.06                         |
|                            | Non-hazardous waste - recycled paper     | 61                                                | 20                                   | 50                                   | 53.85                         |
| <b>Total GHG emission:</b> |                                          | <b>477,004</b>                                    |                                      |                                      |                               |
| <b>Total uncertainty:</b>  |                                          |                                                   |                                      |                                      | <b>6.73</b>                   |
